# Supplementary material for: Facile synthesis and phase stability of Cu-based Na2Cu(SO4)2·xH2O (x = 0–2) sulfate minerals as conversion type battery electrodes
Source: Royal Society of Chemistry journal article supplement (doi:10.1039/d2dt01830f), 2022-01-01
Supplement: d2dt01830f1.pdf [file d2dt01830f1.pdf]

## Supplementary Information

# Facile Synthesis and Phase Stability of Cu-based $\text{Na}_2\text{Cu}(\text{SO}_4)_2 \cdot x\text{H}_2\text{O}$ ( $x = 0-2$ ) Sulfate Minerals as Conversion type Battery Electrodes

*Shashwat Singh,<sup>†#</sup> Audric Neveu,<sup>#</sup> K. Jayanthi,<sup>\$</sup> Tisita Das,<sup>‡</sup> Sudip Chakraborty,<sup>‡</sup>*

*Alexandra Navrotsky,<sup>\$</sup> Valérie Pralong,<sup>#</sup> and Prabeer Barpanda<sup>\*†§</sup>*

<sup>†</sup> Faraday Materials Laboratory (FaMaL), Materials Research Center, Indian Institute of Science, Bangalore 560012, India

<sup>#</sup> Normandie University, ENSICAEN, UNICAEN, CNRS, CRISMAT, 14000 Caen, France

<sup>\$</sup> School of Molecular Sciences and Navrotsky Eyring Center for Materials of the Universe, Arizona State University, Tempe, Arizona 85287, United States

<sup>‡</sup> Materials Theory for Energy Scavenging (MATES) Lab, Harish-Chandra Research Institute (HRI), HBNI, Chhatnag Road, Jhansi, Prayagraj 211019, India

<sup>§</sup> Helmholtz Institute Ulm (HIU), Helmholtzstraße, Ulm 89081, Germany

### Corresponding Author

\*E-mail: [prabeer@iisc.ac.in](mailto:prabeer@iisc.ac.in)

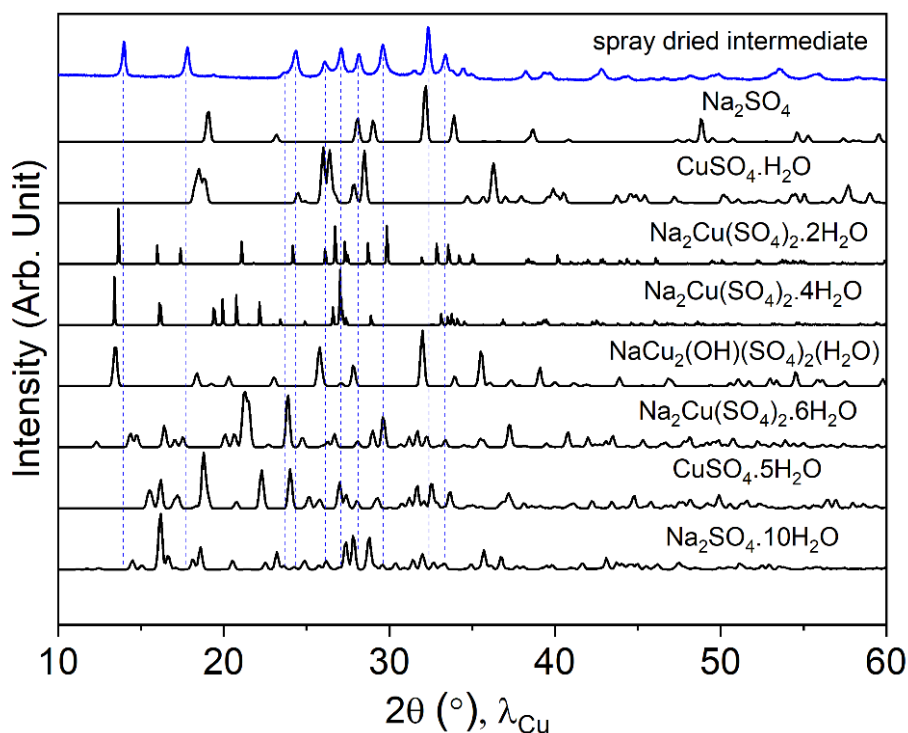

**Fig. S1** PXRD pattern of the spray dried intermediate complex powder (blue line) is compared with the reference patterns of hydrated compounds  $\text{Na}_2\text{Cu}(\text{SO}_4)_2 \cdot x\text{H}_2\text{O}$  ( $x = 2, 4$  and  $6$ ), natrochalcite  $\text{NaCu}_2(\text{SO}_4)_2(\text{OH}) \cdot \text{H}_2\text{O}$  and precursors  $\text{CuSO}_4 \cdot 5\text{H}_2\text{O}$ ,  $\text{CuSO}_4 \cdot \text{H}_2\text{O}$ ,  $\text{Na}_2\text{SO}_4 \cdot 10\text{H}_2\text{O}$  and  $\text{Na}_2\text{SO}_4$ .

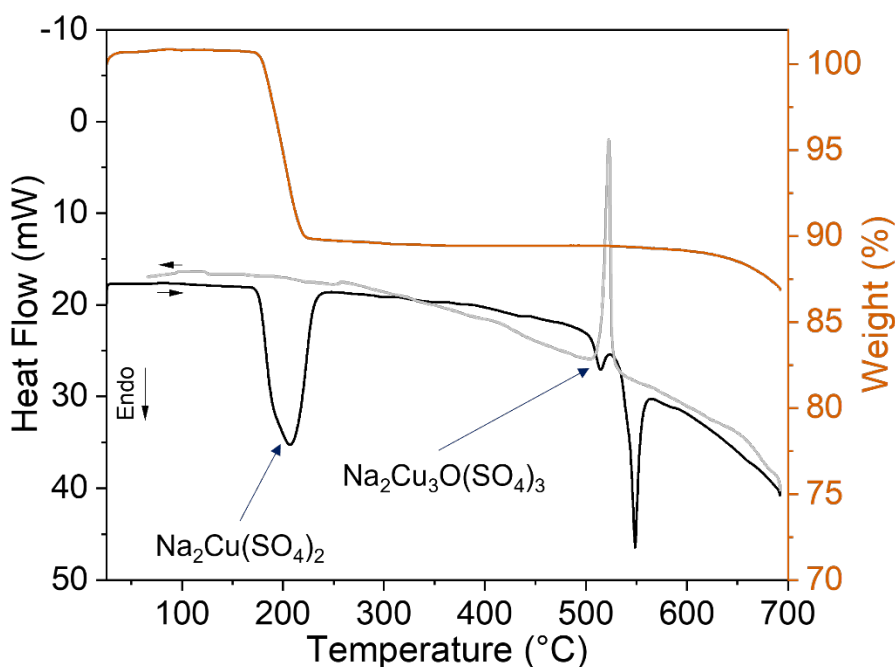

**Fig. S2** Simultaneous thermal analysis (thermogravimetric and differential scanning calorimetry) plot for spray dried intermediate complex powder. The data was acquired at a heating rate of  $10\text{ }^\circ\text{C}/\text{min}$  in  $\text{N}_2$  gas flow ( $50\text{ mL}/\text{min}$ ). The grey line indicates the DSC curve acquired during cooling.

**Table S1** Lattice and atomic parameters of kröhnkite  $\text{Na}_2\text{Cu}(\text{SO}_4)_2 \cdot 2\text{H}_2\text{O}$  determined from Rietveld refinement.

|                                                         |                                                                                            |
|---------------------------------------------------------|--------------------------------------------------------------------------------------------|
| <b>Formula [Molecular weight]</b>                       | <b><math>\text{Na}_2\text{Cu}(\text{SO}_4)_2 \cdot 2\text{H}_2\text{O}</math> [337.68]</b> |
| <b>Crystal system</b>                                   | Monoclinic                                                                                 |
| <b>Space group</b>                                      | $P 2_1/c$ (#14), $Z = 2$                                                                   |
| <b>Unit cell parameter (Å)</b>                          | $a = 5.8078(1)$ , $b = 12.6664(0)$ , $c = 5.5173(4)$<br>$\beta = 108.44$                   |
| <b>Unit cell volume (Å<sup>3</sup>)</b>                 | 385.02(3)                                                                                  |
| <b>Theoretical density (gcm<sup>-3</sup>)</b>           | 2.9128                                                                                     |
| <b>Reliability factors &amp; goodness of fit values</b> | $R_p = 9.82\%$ , $R_{wp} = 8.81\%$ , $\chi^2 = 11.3$                                       |

| Atom | Site | x      | y      | z      | Occupancy | U <sub>iso</sub> |
|------|------|--------|--------|--------|-----------|------------------|
| Na   | 4e   | 0.5744 | 0.1253 | 0.2109 | 1         | 0.0003           |
| Cu   | 2a   | 0      | 0      | 0      | 1         | 0.0003           |
| S    | 4e   | 0.2371 | 0.1198 | 0.5428 | 1         | 0.0003           |
| O1   | 4e   | 0.0108 | 0.1736 | 0.4907 | 1         | 0.0003           |
| O2   | 4e   | 0.3004 | 0.0577 | 0.7796 | 1         | 0.0003           |
| O3   | 4e   | 0.2328 | 0.0481 | 0.3391 | 1         | 0.0003           |
| O4   | 4e   | 0.4456 | 0.1940 | 0.5635 | 1         | 0.0003           |
| O5   | 4e   | 0.8374 | 0.1366 | 0.9497 | 1         | 0.0003           |
| H1   | 4e   | 0.8976 | 0.1859 | 0.9680 | 1         | 0.0003           |
| H2   | 4e   | 0.7120 | 0.1400 | 0.7900 | 1         | 0.0003           |

**Table S2** Lattice and atomic parameters of saranchinaite  $\text{Na}_2\text{Cu}(\text{SO}_4)_2$  determined from Rietveld refinement.

|                                                         |                                                                            |
|---------------------------------------------------------|----------------------------------------------------------------------------|
| <b>Formula [Molecular weight]</b>                       | <b><math>\text{Na}_2\text{Cu}(\text{SO}_4)_2</math> [301.65]</b>           |
| <b>Crystal system</b>                                   | Monoclinic                                                                 |
| <b>Space group</b>                                      | $P 2_1$ (#4), $Z = 8$                                                      |
| <b>Unit cell parameter (Å)</b>                          | $a = 8.9672(9)$ , $b = 15.5408(0)$ , $c = 10.1401(0)$<br>$\beta = 107.087$ |
| <b>Unit cell volume (Å<sup>3</sup>)</b>                 | 1350.74                                                                    |
| <b>Theoretical density (gcm<sup>-3</sup>)</b>           | 2.9667                                                                     |
| <b>Reliability factors &amp; goodness of fit values</b> | $R_p = 14.3\%$ , $R_{wp} = 14.6\%$ , $\chi^2 = 21.25$                      |

| Atom | Site | x       | y       | z       | Occupancy | $U_{iso}$ |
|------|------|---------|---------|---------|-----------|-----------|
| Na1  | 2a   | 0.28374 | 0.42257 | 0.05243 | 1         | 0.0003    |
| Na2  | 2a   | 0.28937 | 0.41204 | 0.61718 | 1         | 0.0003    |
| Na3  | 2a   | 0.97519 | 0.68519 | 0.24565 | 1         | 0.0003    |
| Na4  | 2a   | 0.61794 | 0.54975 | 0.66348 | 1         | 0.0003    |
| Na5  | 2a   | 0.36251 | 0.80324 | 0.41809 | 1         | 0.0004    |
| Na6  | 2a   | 0.60322 | 0.58649 | 0.08643 | 1         | 0.0003    |
| Na7  | 2a   | 0.93999 | 0.72662 | 0.66951 | 1         | 0.0003    |
| Na8  | 2a   | 0.62924 | 0.26826 | 0.15688 | 1         | 0.0002    |
| Cu1  | 2a   | 0.65082 | 0.07897 | 0.67666 | 1         | 0.0002    |
| Cu2  | 2a   | 0.92753 | 0.31663 | 0.01380 | 1         | 0.0001    |
| Cu3  | 2a   | 0.90613 | 0.53165 | 0.96179 | 1         | 0.0002    |
| Cu4  | 2a   | 0.90104 | 0.53194 | 0.48433 | 1         | 0.0002    |
| O1   | 2a   | 0.87930 | 0.05876 | 0.03320 | 1         | 0.0002    |
| O2   | 2a   | 0.00950 | 0.36789 | 0.23260 | 1         | 0.0002    |
| O3   | 2a   | 0.96460 | 0.41646 | 0.91060 | 1         | 0.0002    |
| O4   | 2a   | 0.85550 | 0.64283 | 0.02120 | 1         | 0.0002    |
| O5   | 2a   | 0.50010 | 0.67831 | 0.38250 | 1         | 0.0002    |
| O6   | 2a   | 0.84960 | 0.79062 | 0.95450 | 1         | 0.0002    |
| O7   | 2a   | 0.69060 | 0.50090 | 0.91580 | 1         | 0.0003    |
| O8   | 2a   | 0.61240 | 0.71596 | 0.93700 | 1         | 0.0003    |
| O9   | 2a   | 0.88390 | 0.47591 | 0.68250 | 1         | 0.0003    |
| O10  | 2a   | 0.71580 | 0.67068 | 0.28010 | 1         | 0.0003    |

|     |    |         |          |         |   |        |
|-----|----|---------|----------|---------|---|--------|
| O11 | 2a | 0.73580 | 0.21729  | 0.37890 | 1 | 0.0003 |
| O12 | 2a | 0.74370 | 0.61348  | 0.50660 | 1 | 0.0002 |
| O13 | 2a | 0.71220 | 0.34973  | 0.98610 | 1 | 0.0002 |
| O14 | 2a | 0.50910 | 0.01872  | 0.74650 | 1 | 0.0002 |
| O15 | 2a | 0.21090 | 0.47467  | 0.27310 | 1 | 0.0002 |
| O16 | 2a | 0.05710 | 0.45993  | 0.43170 | 1 | 0.0002 |
| O17 | 2a | 0.90050 | 0.32126  | 0.71640 | 1 | 0.0003 |
| O18 | 2a | 0.94100 | 0.11454  | 0.43230 | 1 | 0.0002 |
| O19 | 2a | 0.79440 | 0.14012  | 0.59220 | 1 | 0.0002 |
| O20 | 2a | 0.55720 | 0.39300  | 0.75650 | 1 | 0.0003 |
| O21 | 2a | 0.13590 | 0.40572  | 0.76670 | 1 | 0.0003 |
| O22 | 2a | 0.64360 | 0.13436  | 0.01570 | 1 | 0.0003 |
| O23 | 2a | 0.79190 | 0.16699  | 0.85730 | 1 | 0.0002 |
| O24 | 2a | 0.76060 | 0.67814  | 0.78100 | 1 | 0.0003 |
| O25 | 2a | 0.48680 | -0.13490 | 0.73140 | 1 | 0.0003 |
| O26 | 2a | 0.88610 | 0.20960  | 0.09590 | 1 | 0.0002 |
| O27 | 2a | 0.47780 | 0.42807  | 0.95780 | 1 | 0.0004 |
| O28 | 2a | 0.72610 | 0.76692  | 0.46900 | 1 | 0.0003 |
| O29 | 2a | 0.46640 | -0.05170 | 0.52530 | 1 | 0.0003 |
| O30 | 2a | 0.26130 | -0.04830 | 0.63560 | 1 | 0.0003 |
| O31 | 2a | 0.94220 | 0.51881  | 0.20350 | 1 | 0.0002 |
| O32 | 2a | 0.66990 | 0.06576  | 0.38080 | 1 | 0.0003 |
| S1  | 2a | 0.56747 | 0.41358  | 0.89123 | 1 | 0.0001 |
| S2  | 2a | 0.74208 | 0.71073  | 0.92625 | 1 | 0.0001 |
| S3  | 2a | 0.06562 | 0.43822  | 0.30261 | 1 | 0.0001 |
| S4  | 2a | 0.66852 | 0.69608  | 0.39968 | 1 | 0.0001 |
| S5  | 2a | 0.75860 | 0.14268  | 0.42532 | 1 | 0.0002 |
| S6  | 2a | 0.97682 | 0.40069  | 0.74203 | 1 | 0.0002 |
| S7  | 2a | 0.42819 | -0.06170 | 0.65153 | 1 | 0.0002 |
| S8  | 2a | 0.78464 | 0.14354  | 1.00114 | 1 | 0.0001 |

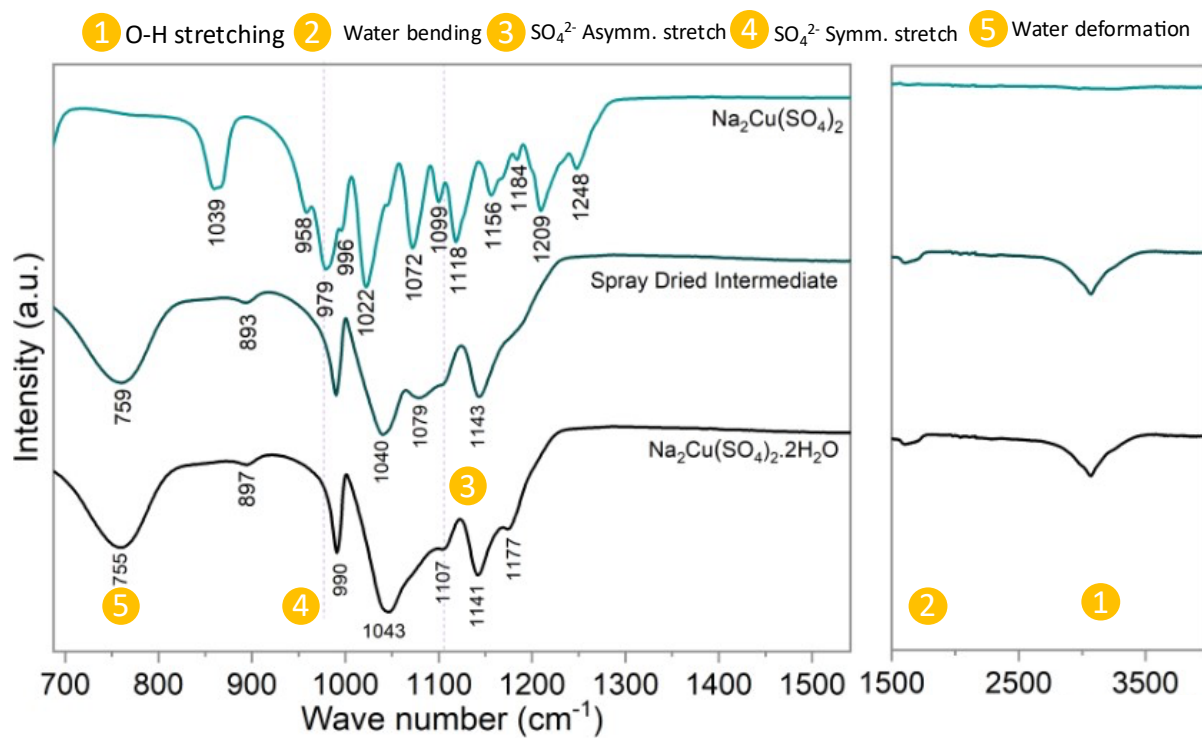

**Fig. S3** FTIR spectra, acquired in ATR mode, of the Cu-krh, src and spray dried intermediate powder. The spectra of Cu-krh and spray dried intermediate powder are quite similar. However, the XRD patterns, as shown in figure 1, are different.

**Table S3.** Bader charge analysis during removal of one sodium from src  $\text{Na}_2\text{Cu}(\text{SO}_4)_2$ .

| Atoms in full-sodiated phase | Bader Charge ( $\Delta q$ ) | Atoms in half-desodiated phase | Bader charge ( $\Delta q$ ) |
|------------------------------|-----------------------------|--------------------------------|-----------------------------|
| Na1                          |                             |                                |                             |
| Na2                          | +0.8568                     | Na2                            | +0.8657                     |
| Na3                          | +0.8526                     | -                              |                             |
| Na4                          | +0.8526                     | Na4                            | +0.8578                     |
| Na5                          | +0.8461                     | Na5                            | +0.8461                     |
| Na6                          | +0.8461                     | -                              |                             |
| Na7                          | +0.8551                     | Na7                            | +0.8549                     |
| Na8                          | +0.8551                     | -                              |                             |
| Na9                          | +0.8639                     | Na9                            | +0.8638                     |
| Na10                         | +0.8639                     | -                              |                             |
| Na11                         | +0.8502                     | Na11                           | +0.8529                     |
| Na12                         | +0.8502                     | -                              |                             |
| Na13                         | +0.8483                     | Na13                           | +0.8490                     |
| Na14                         | +0.8483                     | -                              |                             |
| Na15                         | +0.8431                     | -                              |                             |
| Na16                         | +0.8431                     | Na16                           | +0.8459                     |

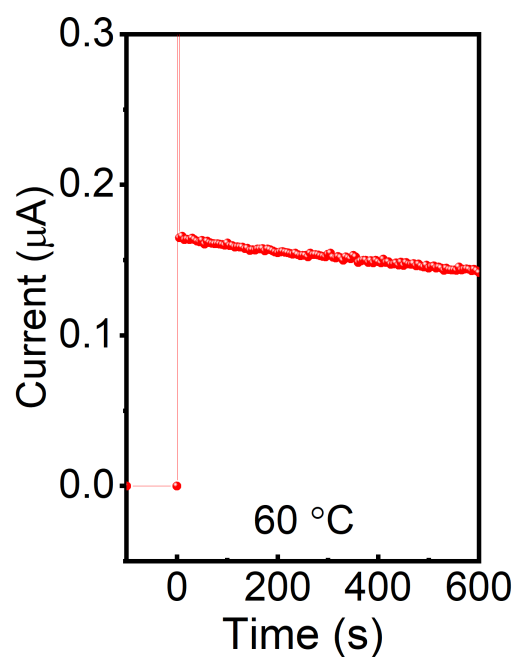

**Fig. S4** The current response of Cu-krh acquired during potentiostatic polarization under an applied potential step of 2V at 60 °C.

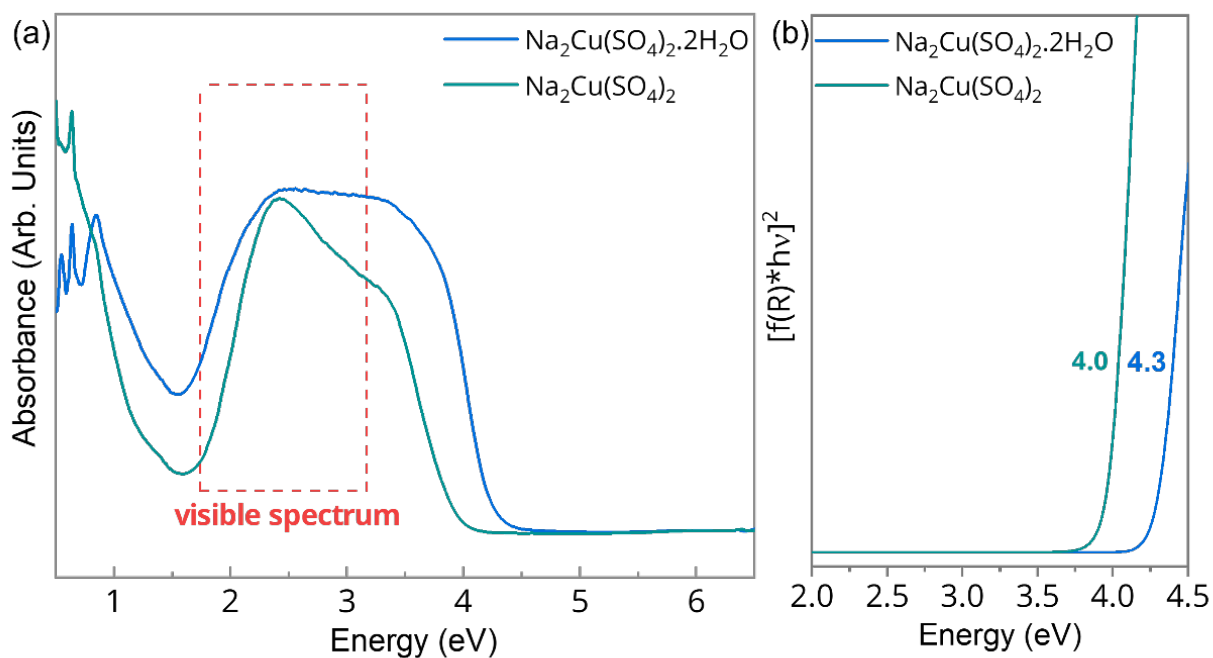

**Fig. S5** (a) UV-VIS-NIR absorption spectra of the src and Cu-krh compounds, and (b) Optical band gap for the src and Cu-krh calculated using Kubelka-Munk function ( $n = 2$ ) applied to UV-VIS-NIR spectra



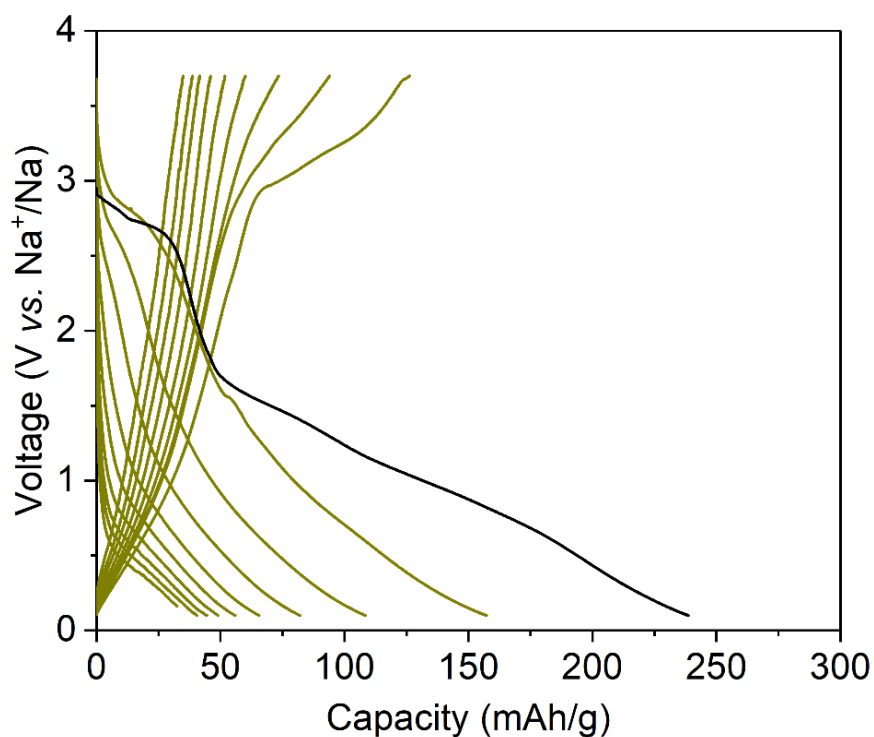

**Fig. S6** Galvanostatic profile of Cu-src  $\text{Na}_2\text{Cu}(\text{SO}_4)_2$  acquired at a current rate of 2 mA/g using 1M  $\text{NaPF}_6$ - EC/DEC electrolyte and Na metal anode in half cell. The black and dark yellow color represent the first and subsequent cycles during the galvanostatic cycling.

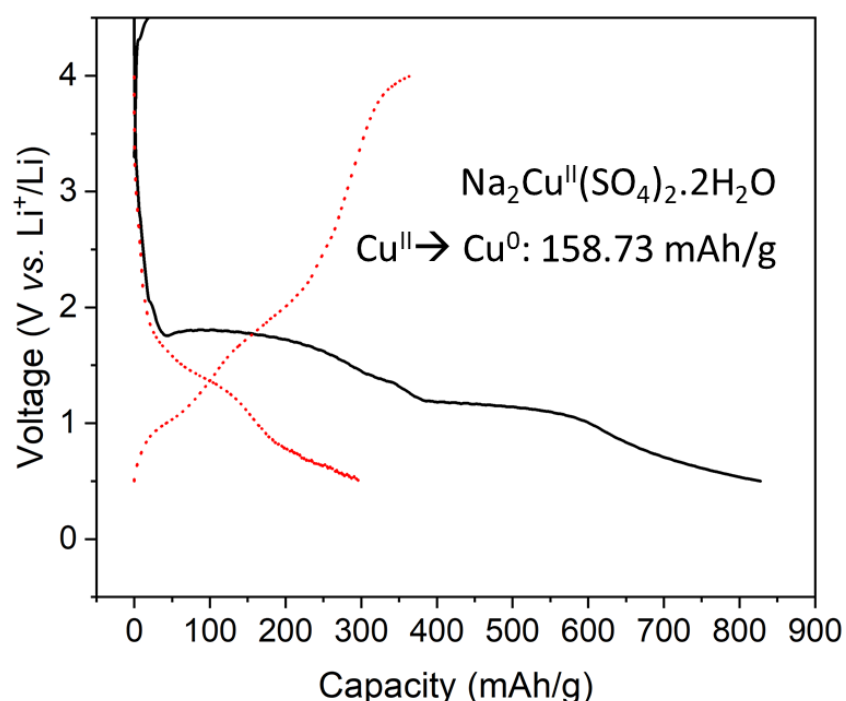

**Fig. S7** Galvanostatic profile of Cu-krh  $\text{Na}_2\text{Cu}(\text{SO}_4)_2 \cdot 2\text{H}_2\text{O}$  acquired at a current rate of 2 mA/g using 1M  $\text{LiClO}_4$ -PC electrolyte and Li metal anode in half cell. The black and red line represent the first and second cycle during the galvanostatic cycling. A different galvanostatic profile of Cu-krh from src may stem from different structure and the water of hydration<sup>1</sup>. The in-depth mechanistic understanding will be pursued in future.

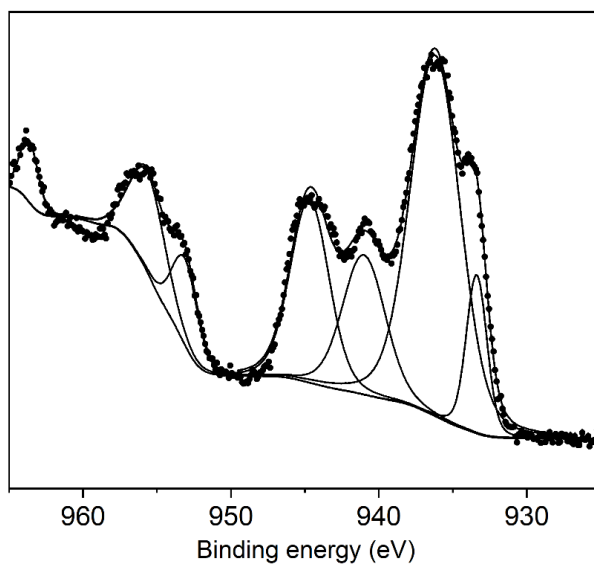

**Fig. S8** XPS spectrum of Cu 2p core peak for pristine Cu-krh electrode. The characteristic satellite peaks of  $\text{Cu}^{2+}$  can be seen at the binding energies: 941.01 eV, 944.68 eV and 963.65 eV.

## References

1. Schwieger, J. N.; Kraytsberg, A.; Ein-Eli, Y. Copper Sulfates as Cathode Materials for Li Batteries. *J. Power Sources* **2011**, *196* (3), 1461–1468. <https://doi.org/10.1016/j.jpowsour.2010.07.090>.
